# Supplementary material
Source: PubMed Central journal article supplement (PMC7534615)

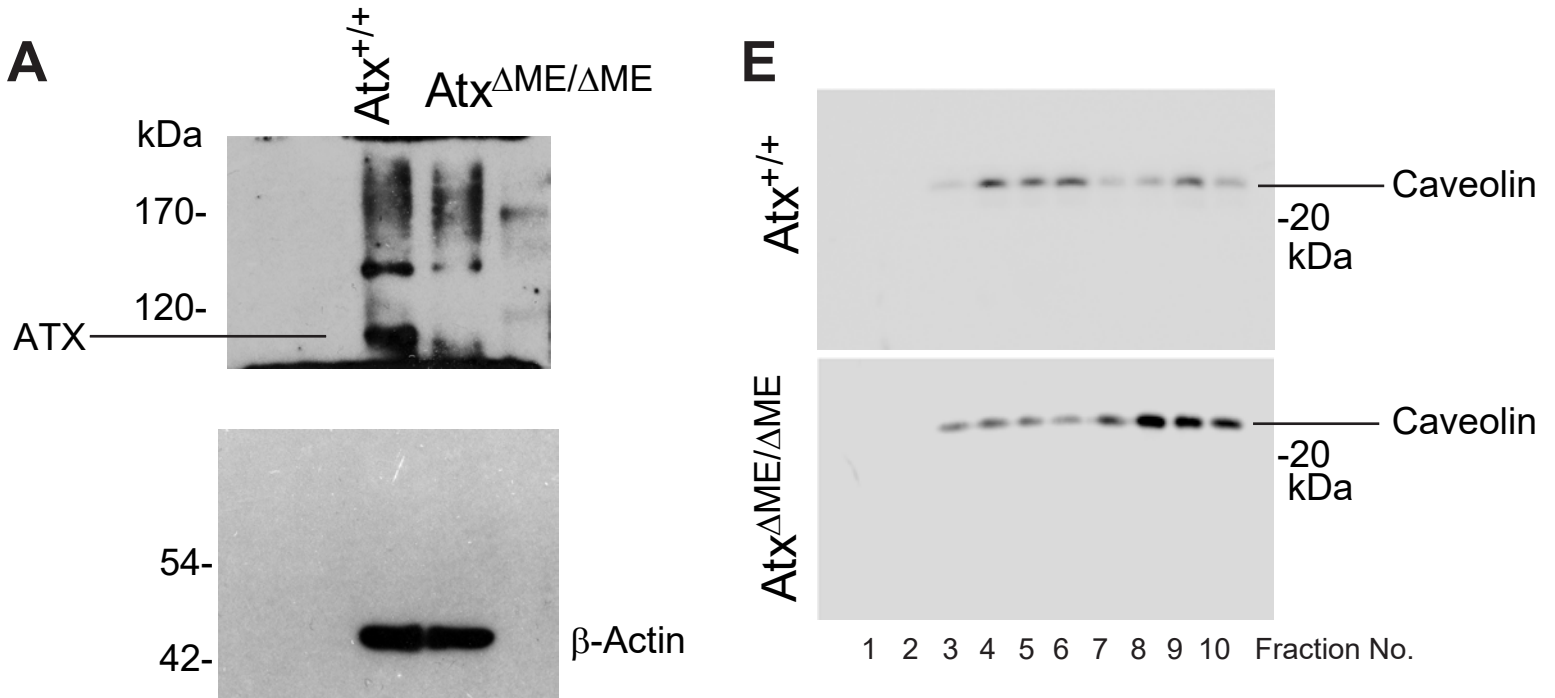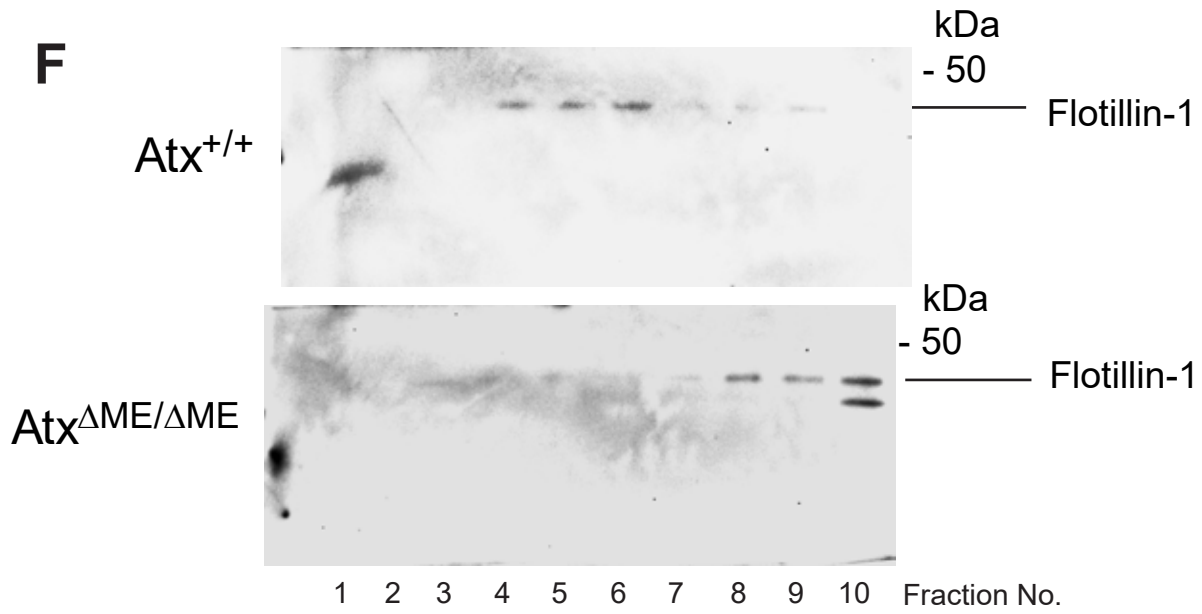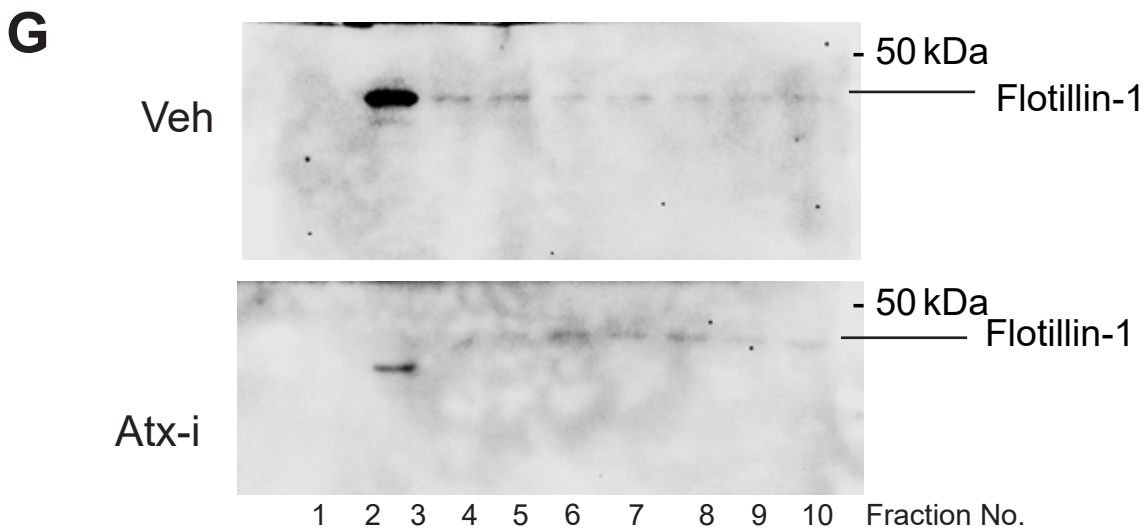

Supplement: EMBR-21-e49332-s003.pdf [file EMBR-21-e49332-s003.pdf]

Original Immunoblot images for Figure 3

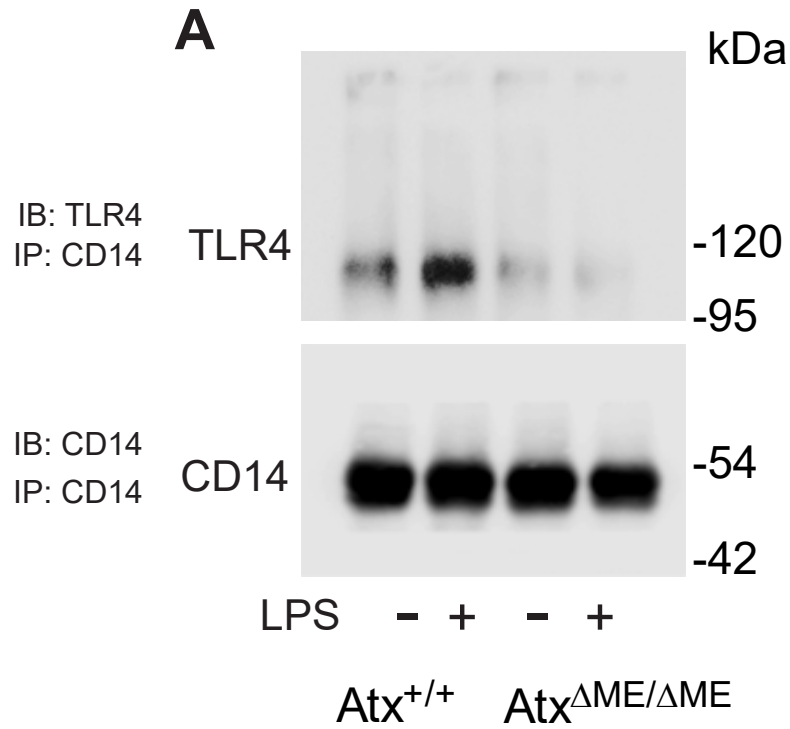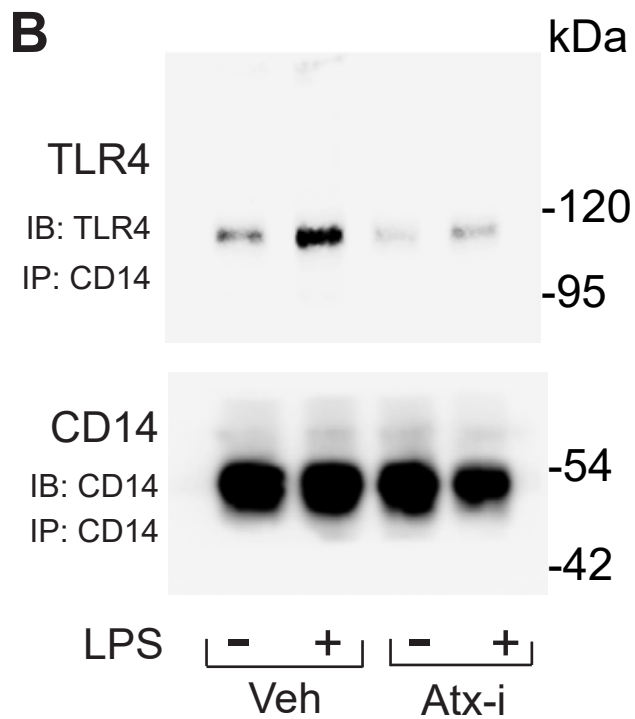

Supplement: EMBR-21-e49332-s004.pdf [file EMBR-21-e49332-s004.pdf]

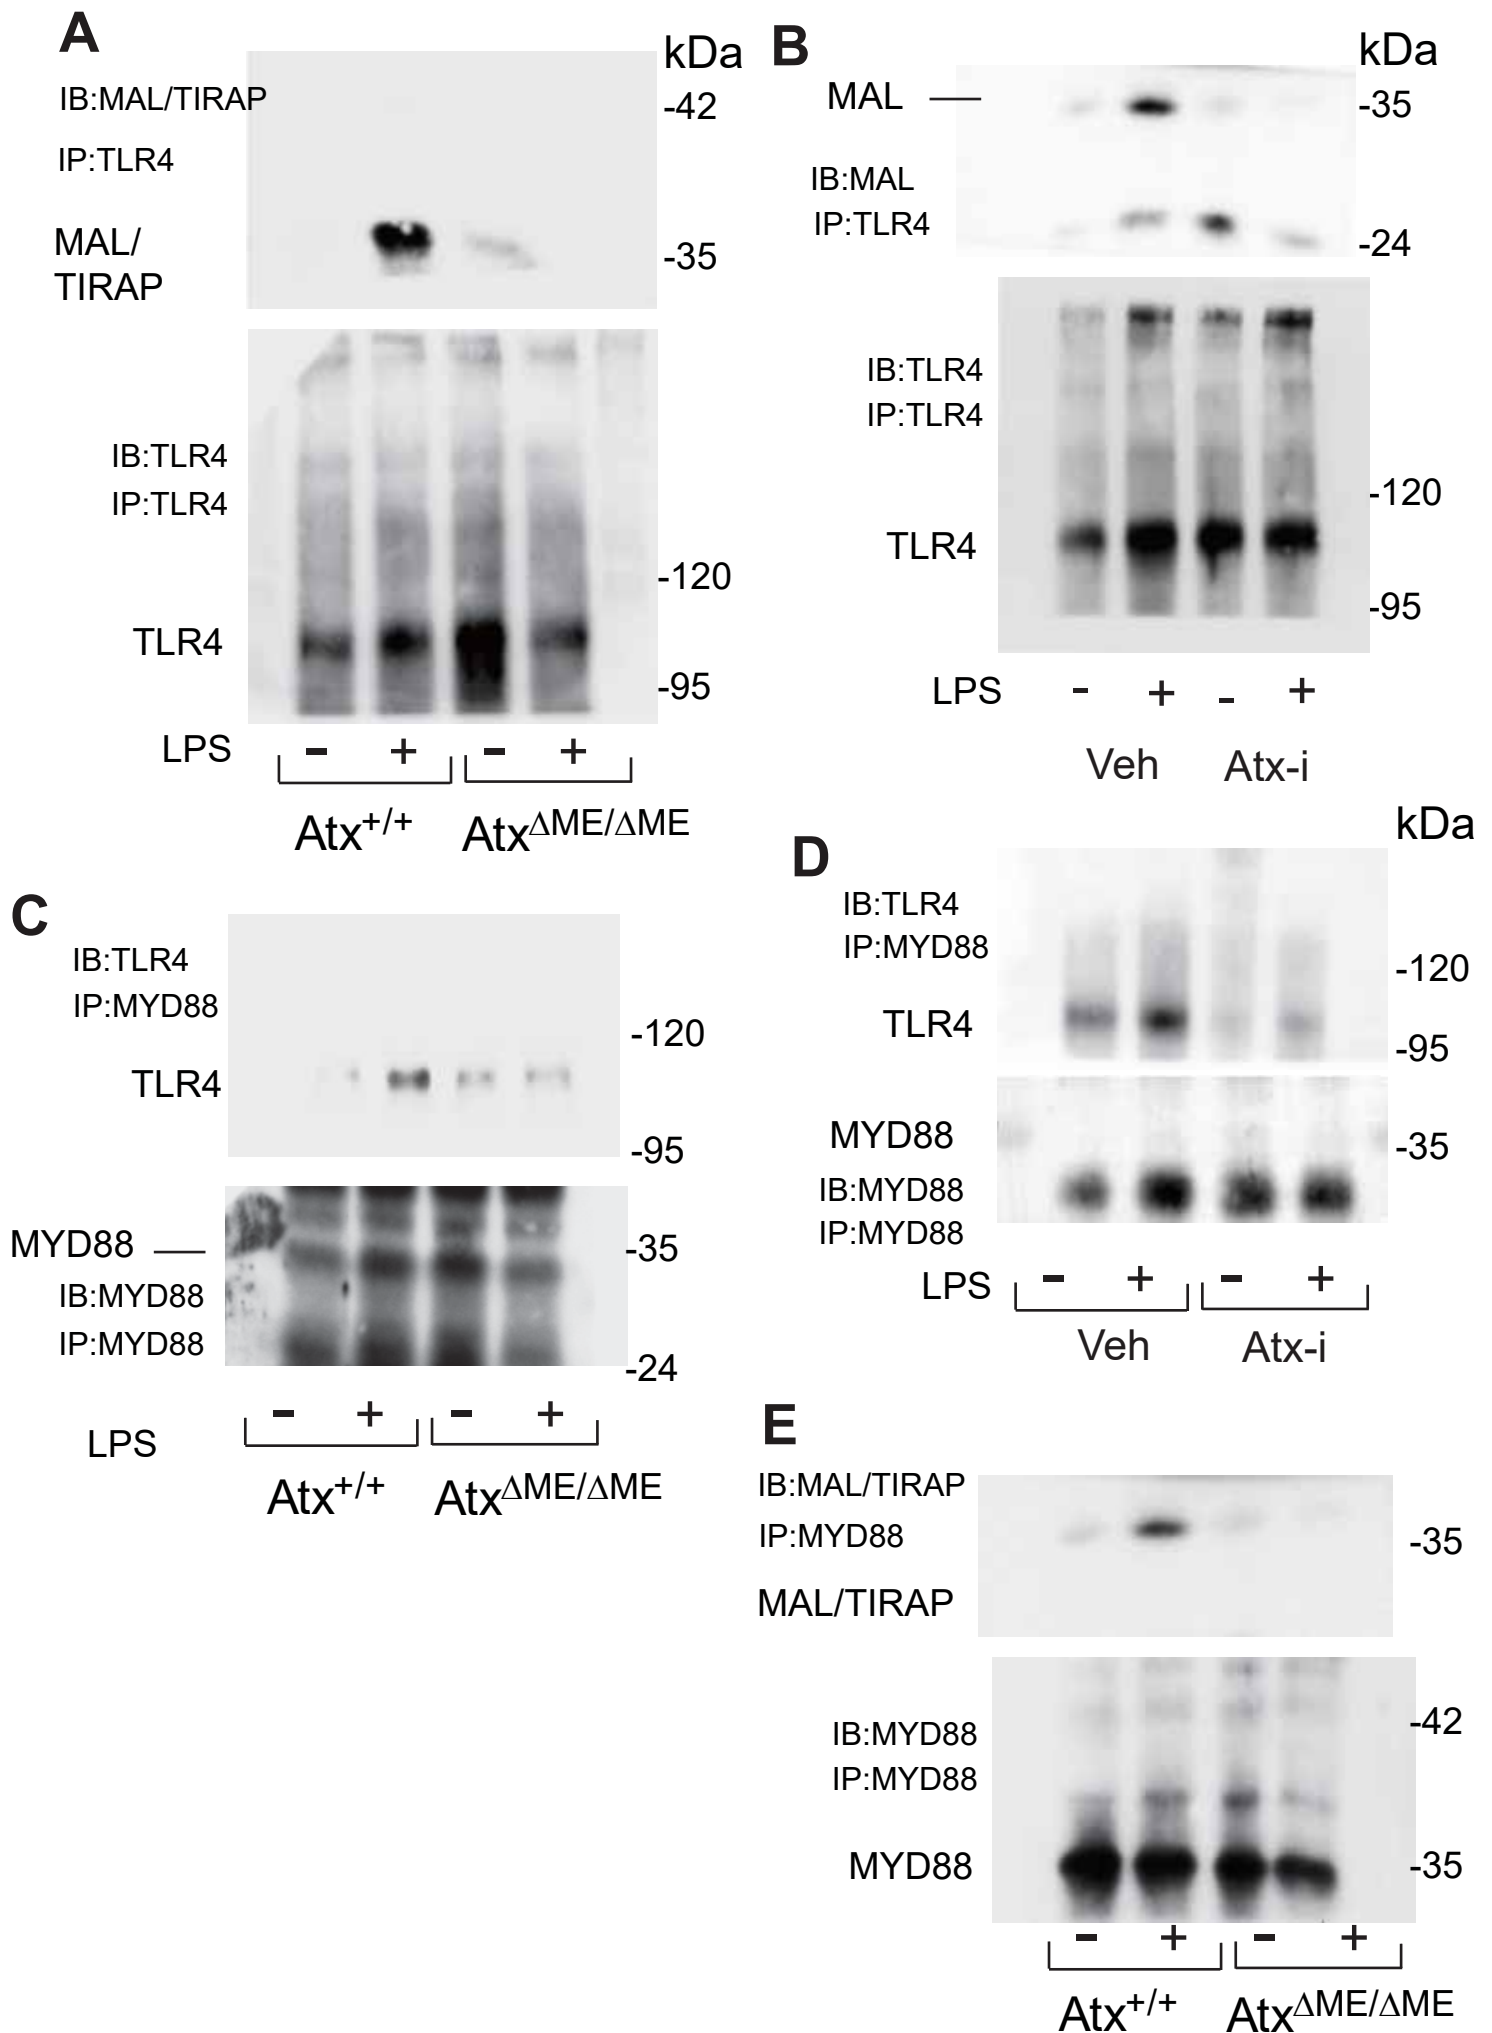

Supplement: EMBR-21-e49332-s005.pdf [file EMBR-21-e49332-s005.pdf]

Original Immunoblot images for Figure 6

**A**

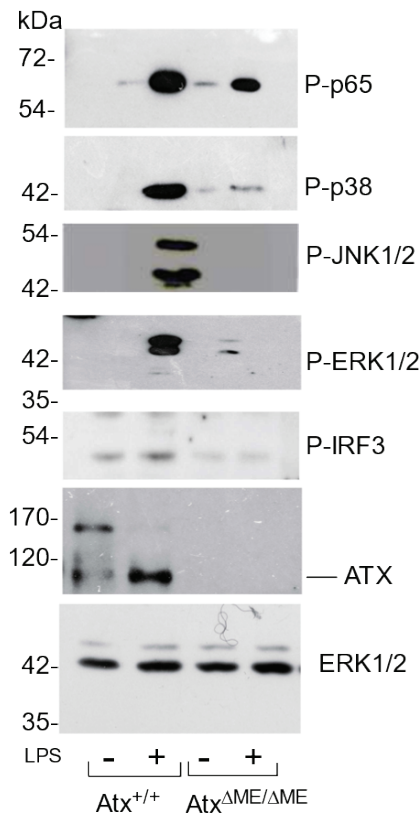

**B**

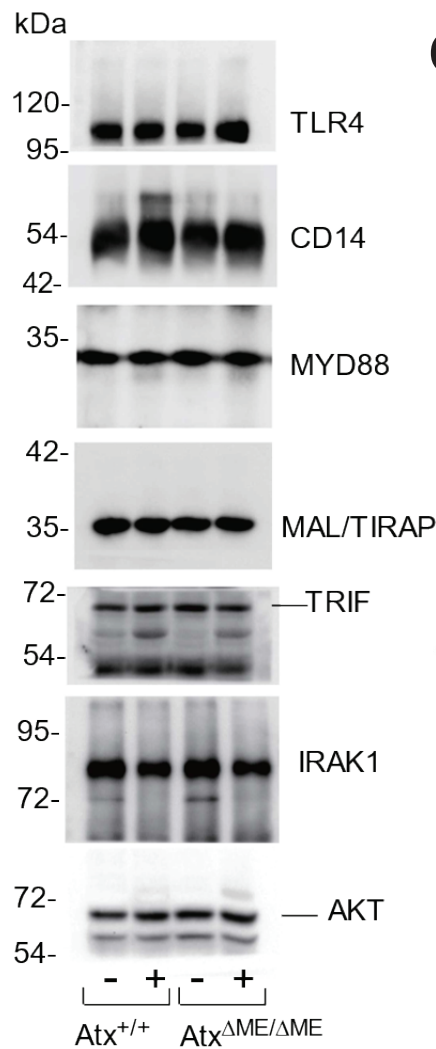

**C**

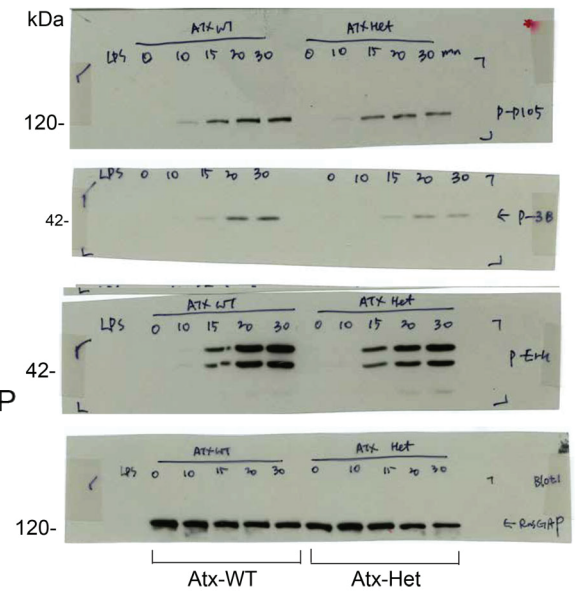

**D**

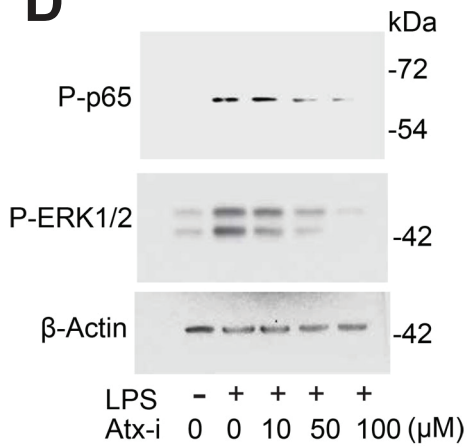

**E**

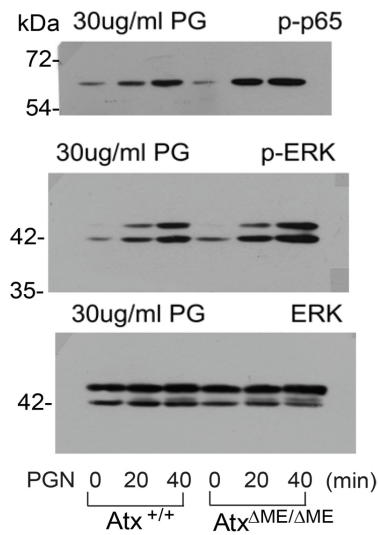

**G**

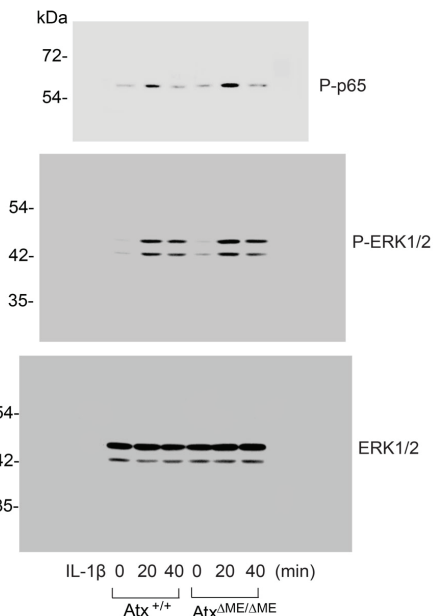

**H**

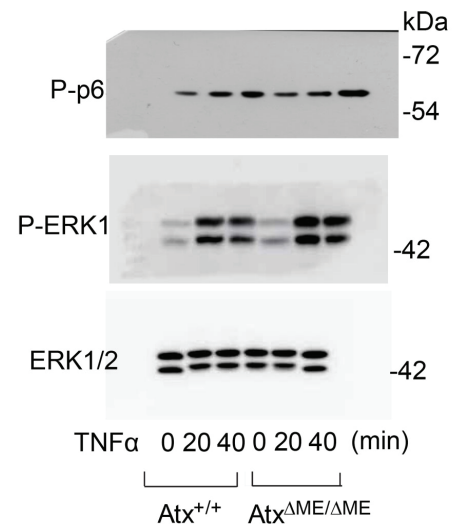

**F**

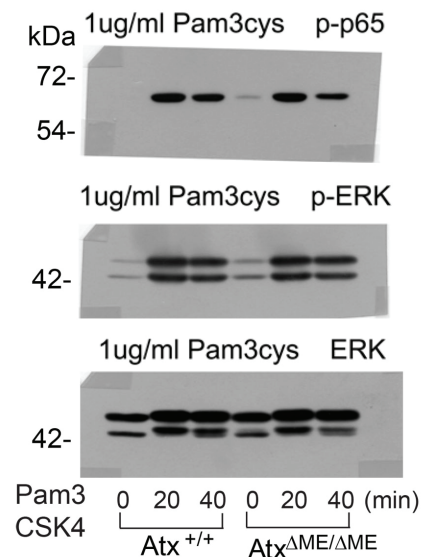

Supplement: EMBR-21-e49332-s006.pdf [file EMBR-21-e49332-s006.pdf]

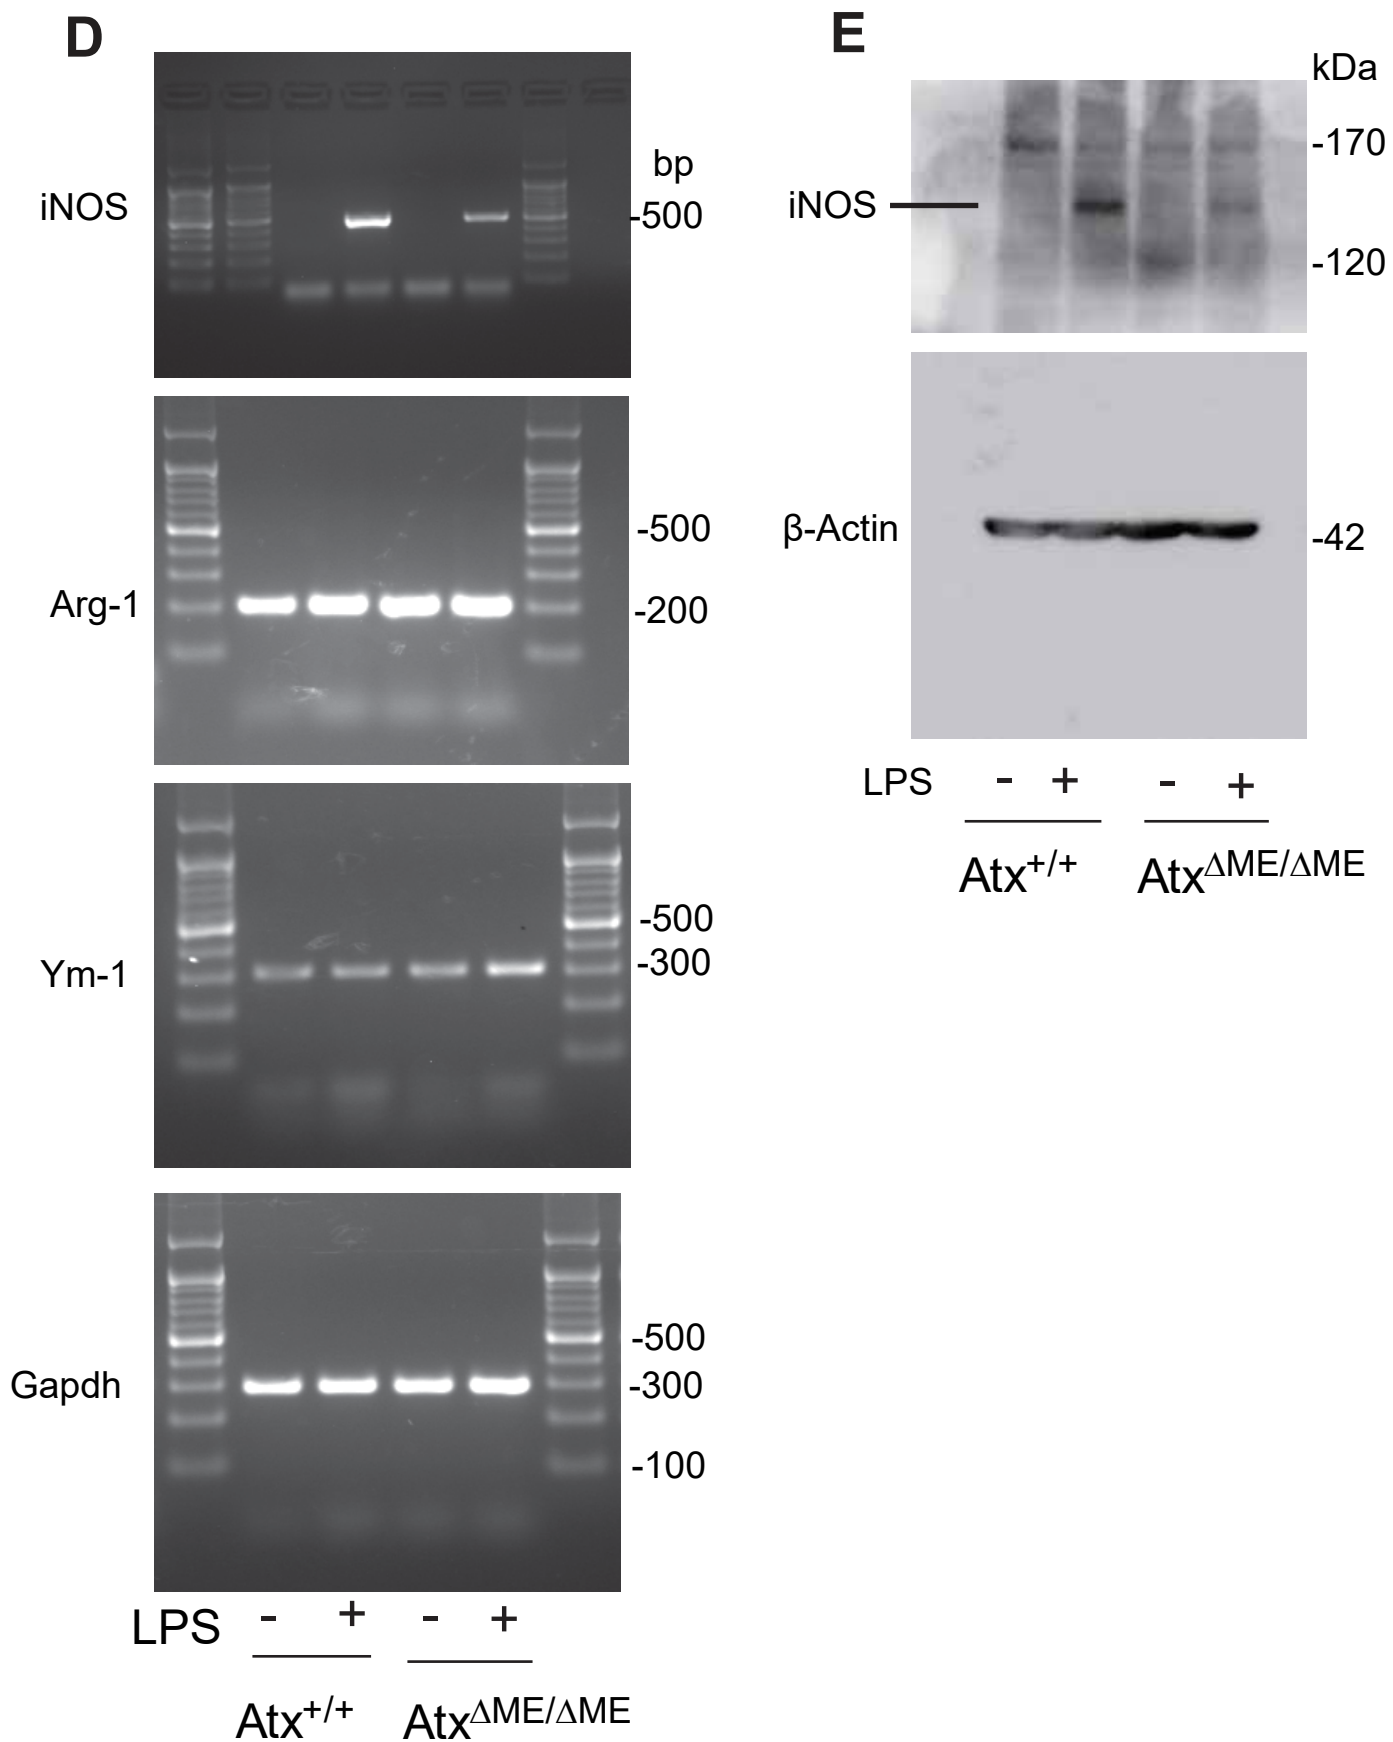

Supplement: EMBR-21-e49332-s007.pdf [file EMBR-21-e49332-s007.pdf]
